# Supplementary material for: Sensing of tryptophan by a non-toxic cobalt(ii) complex
Source: Royal Society of Chemistry journal article supplement (doi:10.1039/c6ra16086g), 2016-01-01
Supplement: c6ra16086g1.pdf [file c6ra16086g1.pdf]

**Electronic Supplementary Information (ESI)**

**Sensing of tryptophan by a non-toxic Cobalt(II) complex**

**Swapan Kumar Jana,<sup>a</sup> Amit Kumar Mandal<sup>b</sup>, Anoop Kumar<sup>c</sup>, Horst Puschmann<sup>d</sup>, Maidul Hossain\*<sup>a</sup> and Sudipta Dalai\*<sup>a</sup>**

---

<sup>a</sup> Department of Chemistry & Chemical Technology, Vidyasagar University, W.B, India. E-mail: [sudipta@mail.vidyasagar.ac.in](mailto:sudipta@mail.vidyasagar.ac.in) (S.Dalai);

[hossainm@mail.vidyasagar.ac.in](mailto:hossainm@mail.vidyasagar.ac.in) (M. Hossain)

<sup>b</sup> Department of Microbiology, Vidyasagar University, W.B, India.

<sup>c</sup> Department of Biotechnology, University of North Bengal, W.B, India.

<sup>d</sup> Department of Chemistry, University of Durham, Durham DH13LE, UK.

---

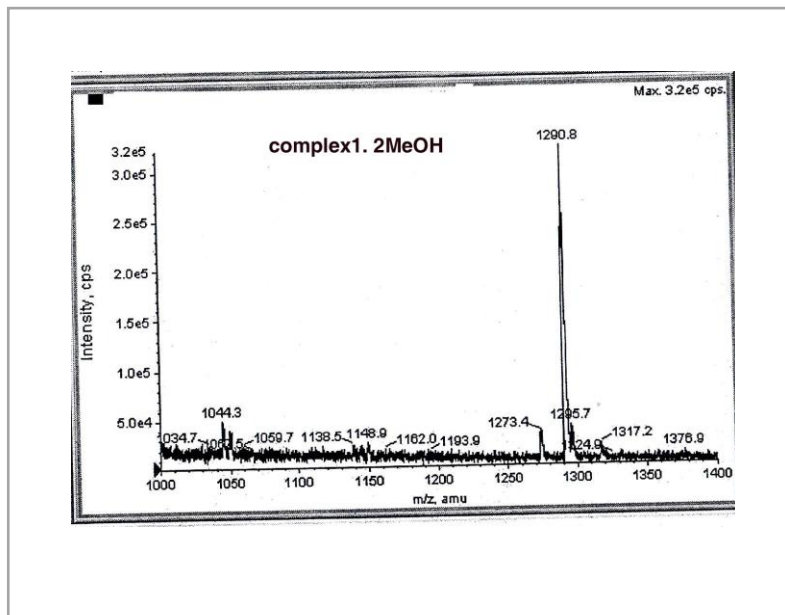

**Fig. S1** LC-MS spectrum of complex1 in MeOH.

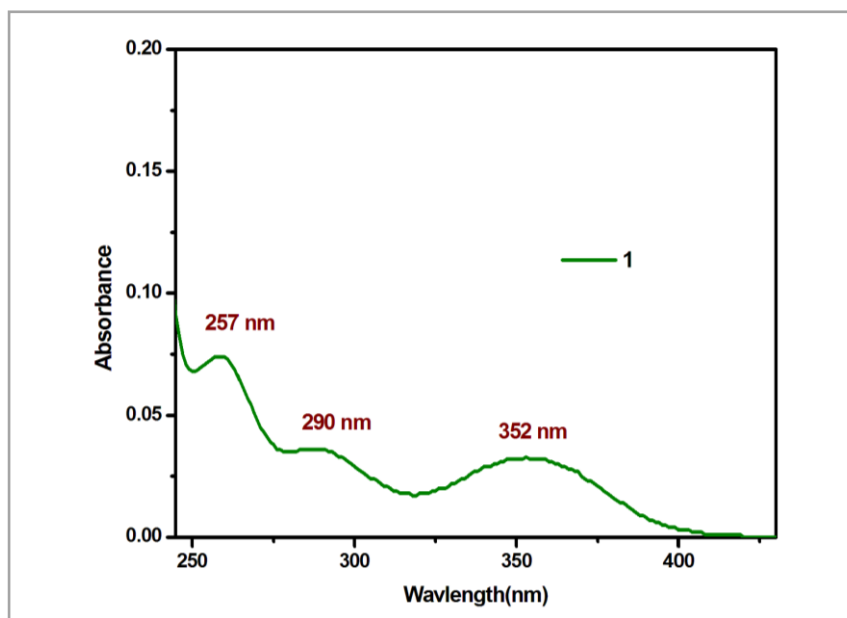

**Fig. S2** UV-vis spectra of 1 (1  $\mu$ M) 1 in PBS buffer (pH = 7.4).

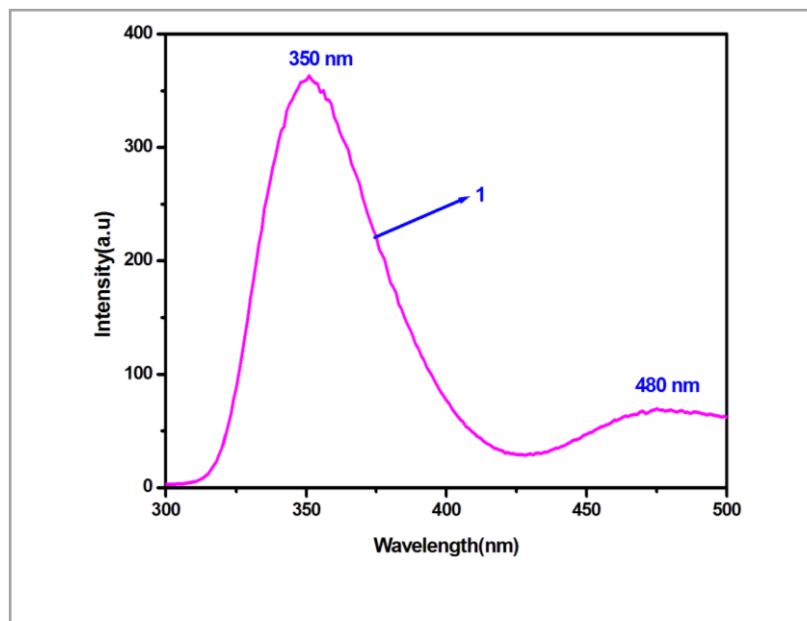

**Fig. S3** Fluorescence spectra of **1** (2.5  $\mu$ M) **1** in PBS buffer (pH = 7.4). ( $\lambda_{\text{ex}}$ =257 nm)

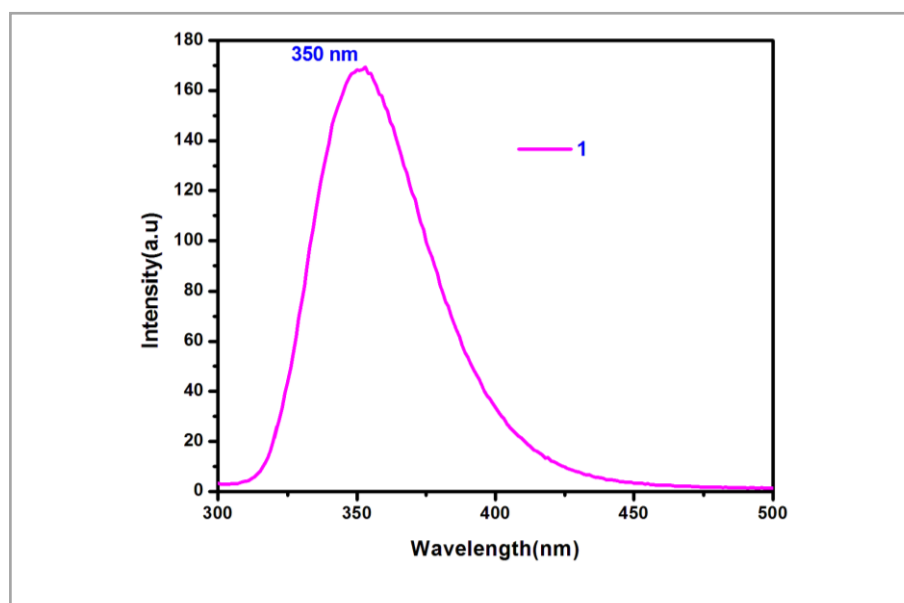

**Fig. S4** Fluorescence spectra of **1** (2.5  $\mu$ M) **1** in PBS buffer (pH = 7.4). ( $\lambda_{\text{ex}}$ =290 nm)

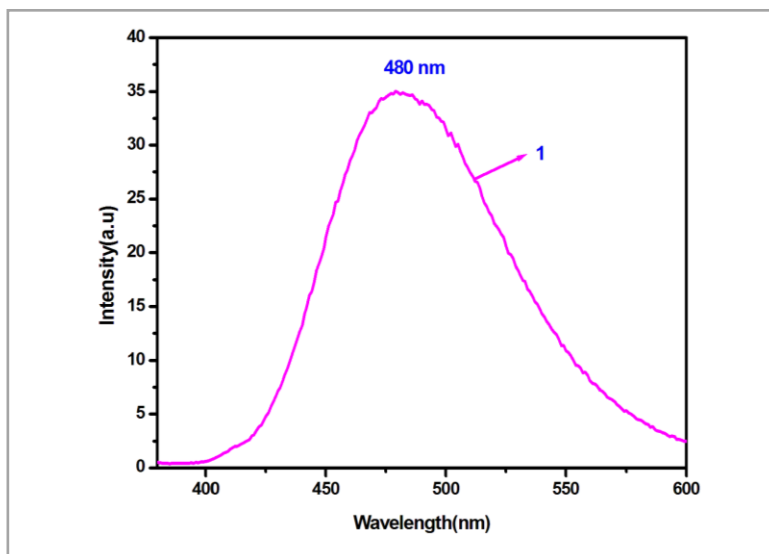

**Fig. S5** Fluorescence spectra of **1** (2.5  $\mu\text{M}$ ) in PBS buffer (pH = 7.4). ( $\lambda_{\text{ex}}$ =352 nm)

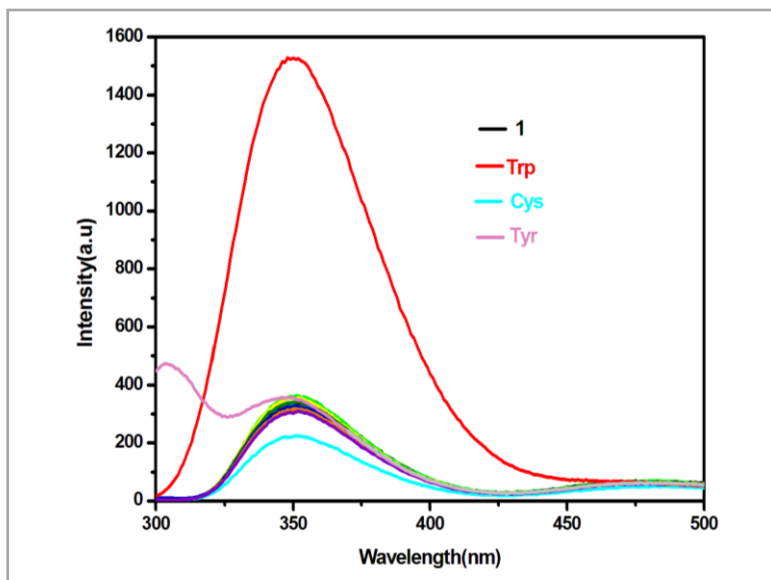

**Fig. S6** Fluorescence spectra of **1** (2.5  $\mu\text{M}$ ) in the presence of different amino acids (100  $\mu\text{M}$ ) in PBS buffer (pH = 7.4). ( $\lambda_{\text{ex}}$ =257 nm)

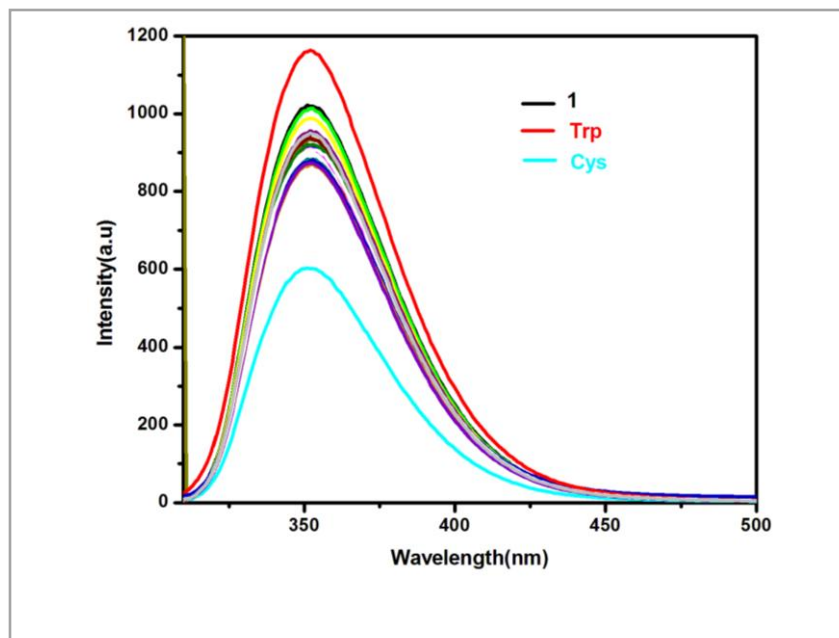

**Fig. S7** Fluorescence spectra of **1** (2.5  $\mu\text{M}$ ) in the presence of different amino acids (100  $\mu\text{M}$ ) in PBS buffer (pH = 7.4). ( $\lambda_{\text{ex}}$ =290 nm)

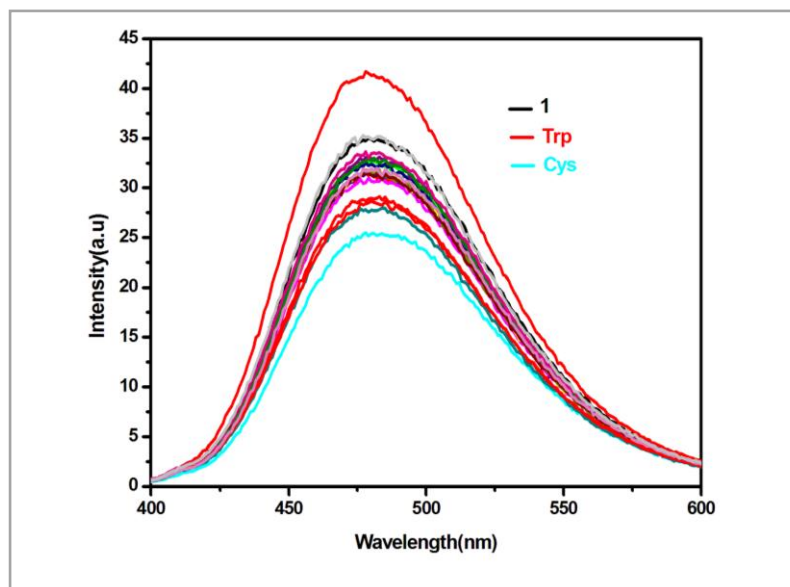

**Fig. S8** Fluorescence spectra of **1** (2.5  $\mu\text{M}$ ) in the presence of different amino acids (100  $\mu\text{M}$ ) in PBS buffer (pH = 7.4). ( $\lambda_{\text{ex}}$ =352 nm)

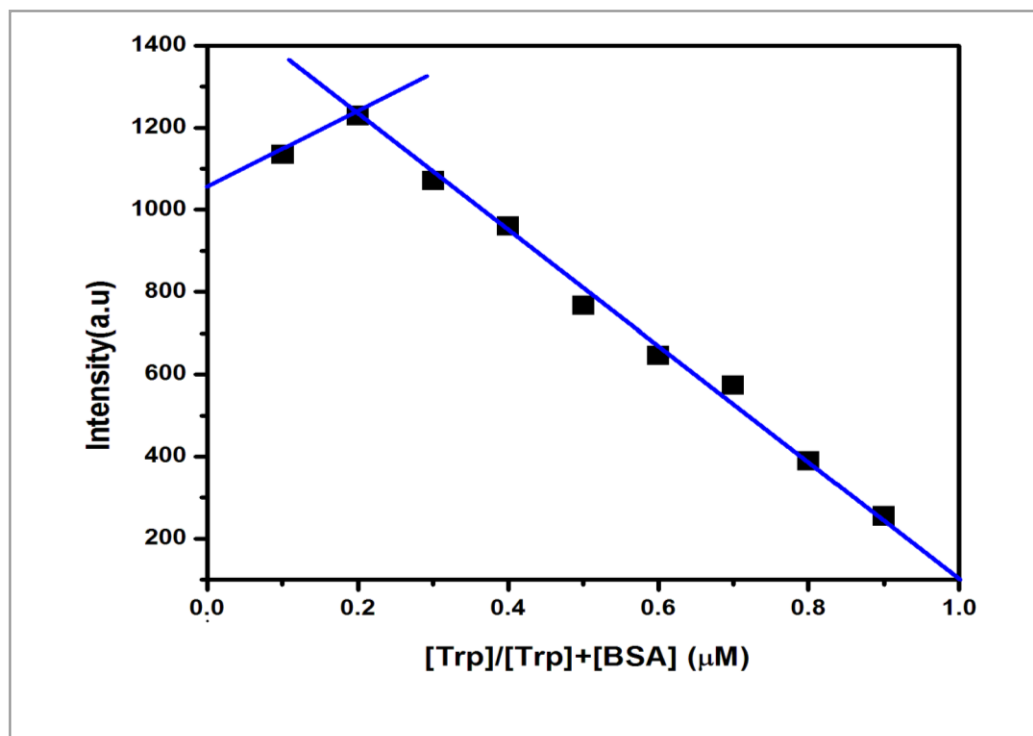

**Fig. S9** Job's plot for determining the stoichiometry of **1-*Trp*** complexation in PBS buffer (pH = 7.4). ( $\lambda_{\text{ex}}=290$  nm)

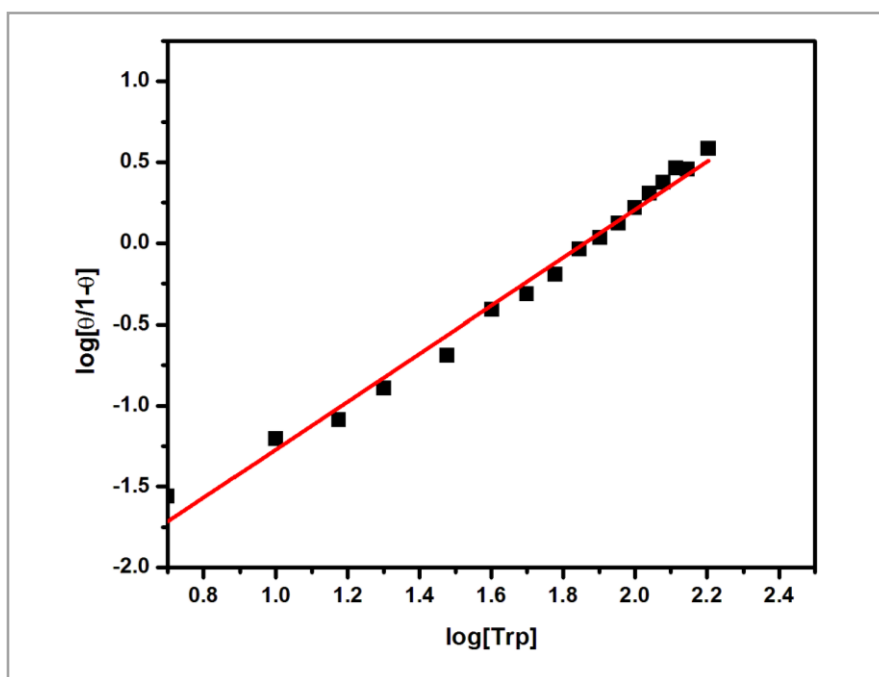

**Fig. S10** **1-*Trp*** Hill's plot, where legends carry the respective meanings.

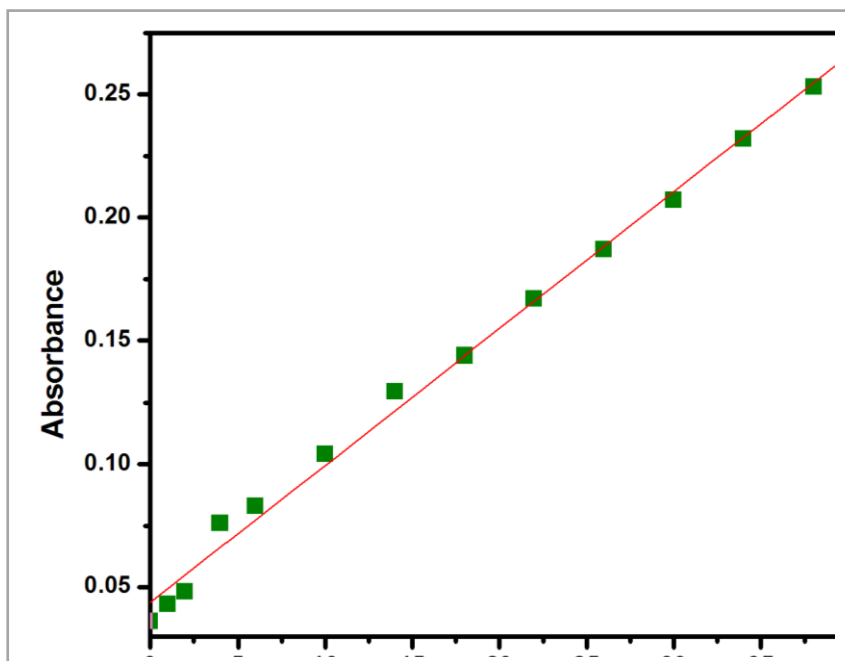

**Fig. S11** The absorption of complex1 (1  $\mu\text{M}$ ) at 287 nm as a function of Trp concentration.

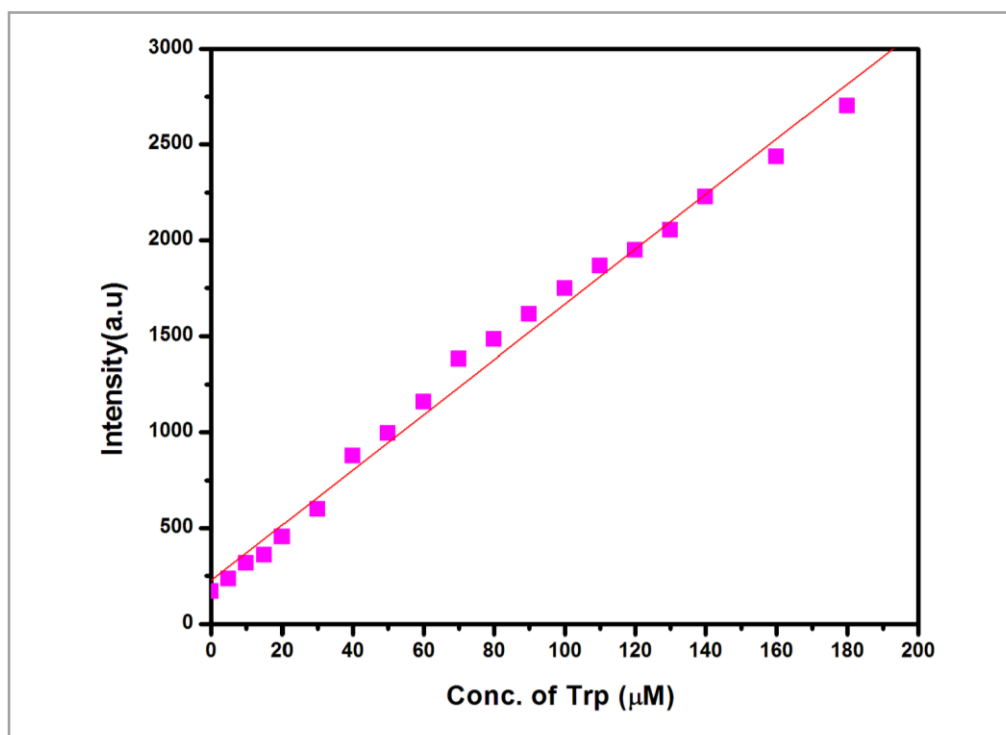

**Fig. S12** The fluorescence spectra of complex1 (0.5  $\mu\text{M}$ ) at 350 nm as a function of Trp concentration. ( $\lambda_{\text{ex}}=290$  nm)

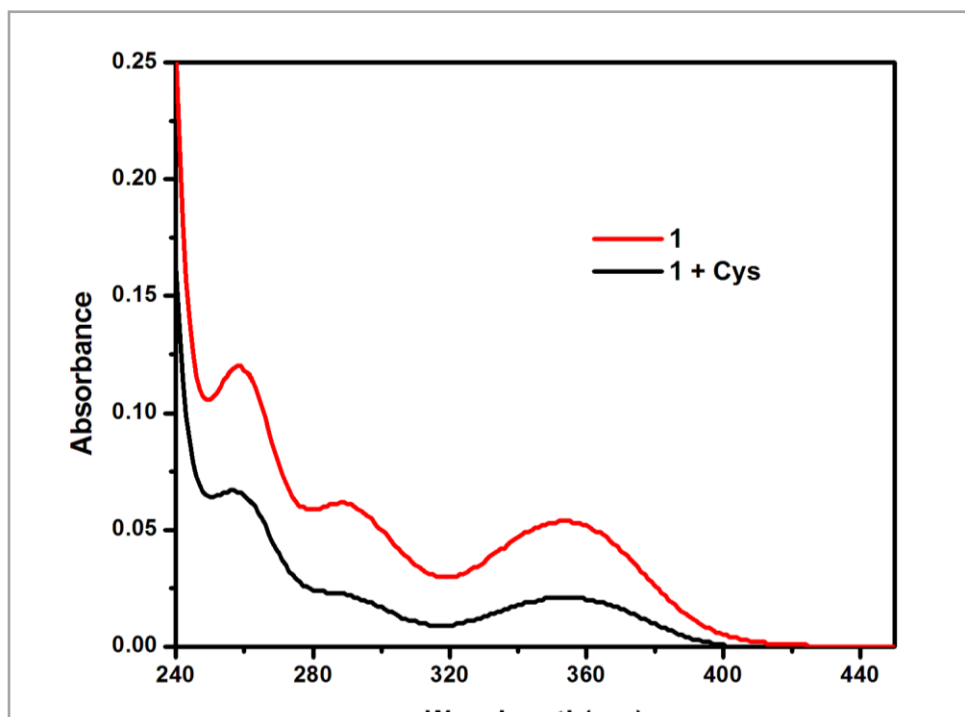

**Fig. S13** UV-vis spectra of **1** (1  $\mu\text{M}$ ) in both the presence and absence of Cys (40  $\mu\text{M}$ ) in PBS buffer (pH = 7.4).

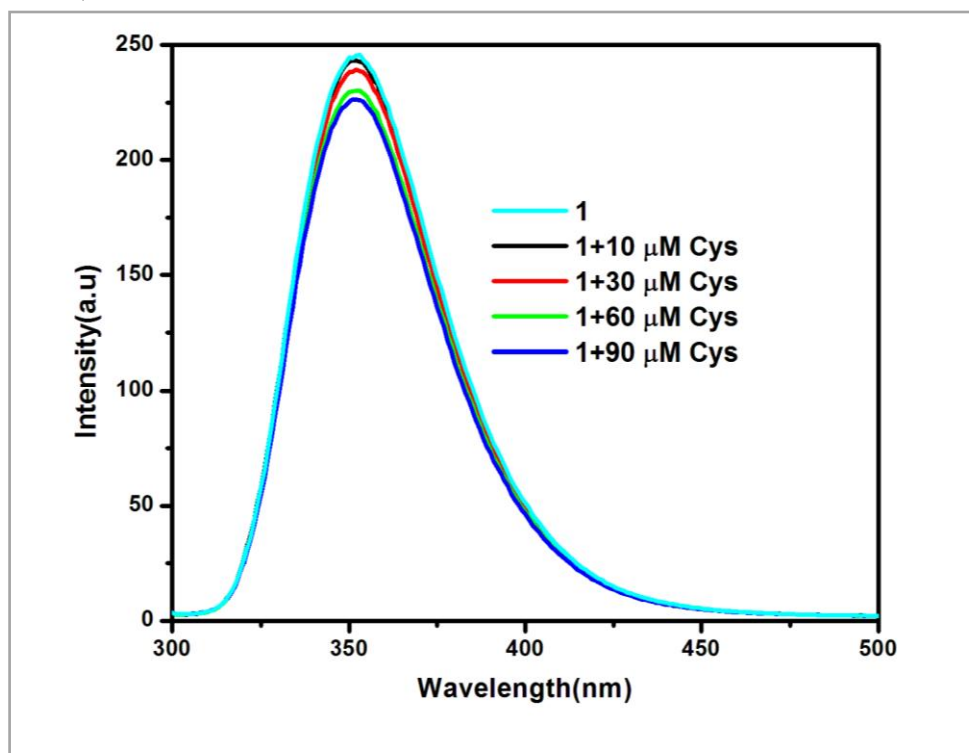

**Fig. S14** Fluorescence spectra of **1** (1  $\mu\text{M}$ ) in the presence of increasing amount of Cys (0 to 90  $\mu\text{M}$ ) in PBS buffer (pH = 7.4). ( $\lambda_{\text{ex}}$ =290 nm)



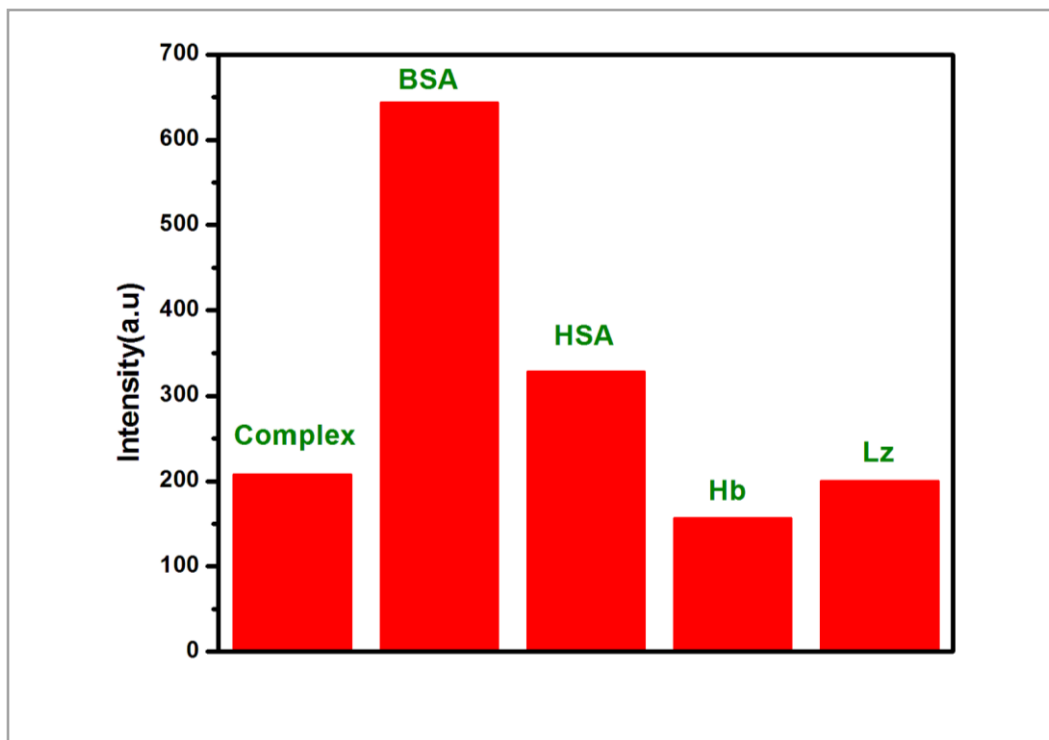

**Fig. S15** Bar diagram represents fluorescence spectra of **1** (0.5  $\mu$ M) in the presence of different proteins (10  $\mu$ M) in PBS buffer (pH = 7.4).

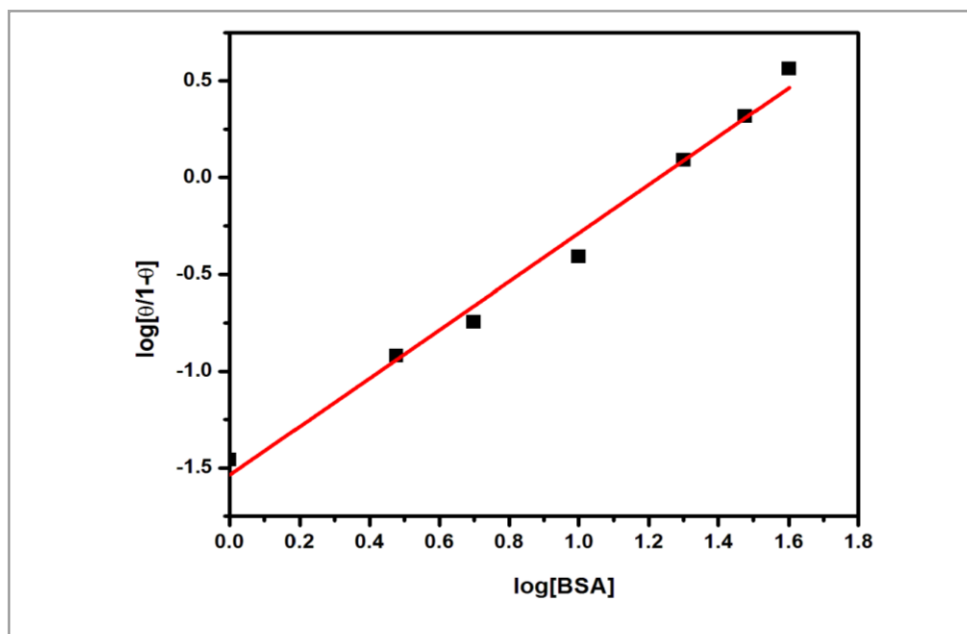

**Fig. S16** **1**-BSA Hill's plot, where legends carry the respective meanings.

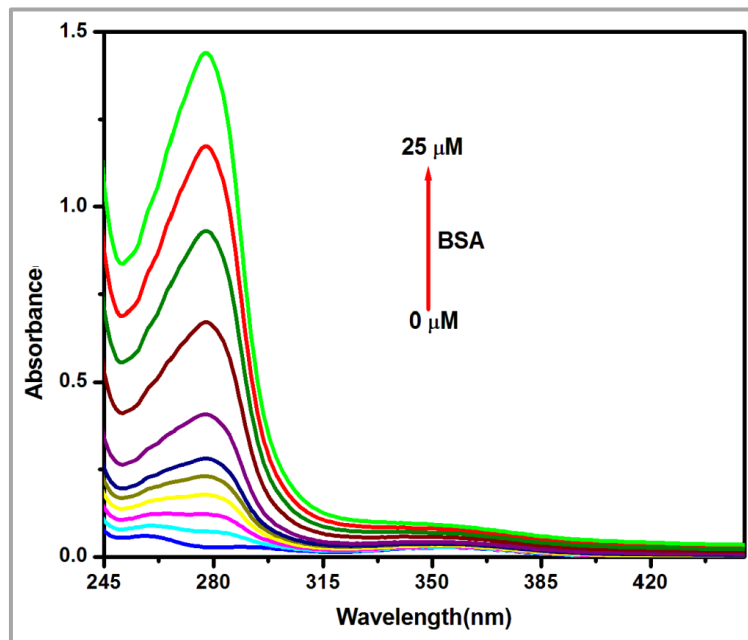

**Fig. S17** UV-vis spectra of **1** ( $1 \mu\text{M}$ ) in the presence of increasing amount of BSA ( $0$  to  $25 \mu\text{M}$ ) in PBS buffer ( $\text{pH} = 7.4$ ).

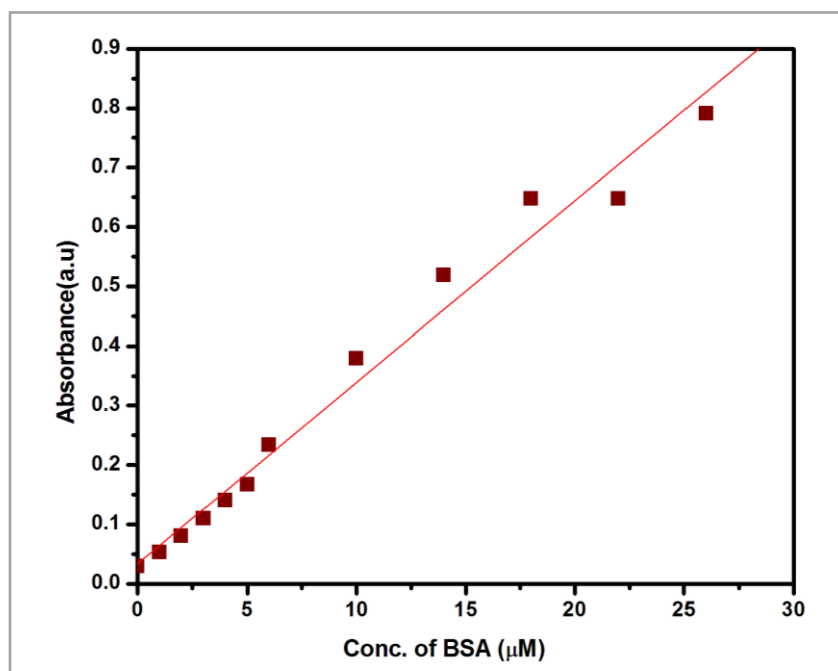

**Fig. S18** The absorption of complex **1** ( $1 \mu\text{M}$ ) at  $287 \text{ nm}$  as a function of BSA concentration.

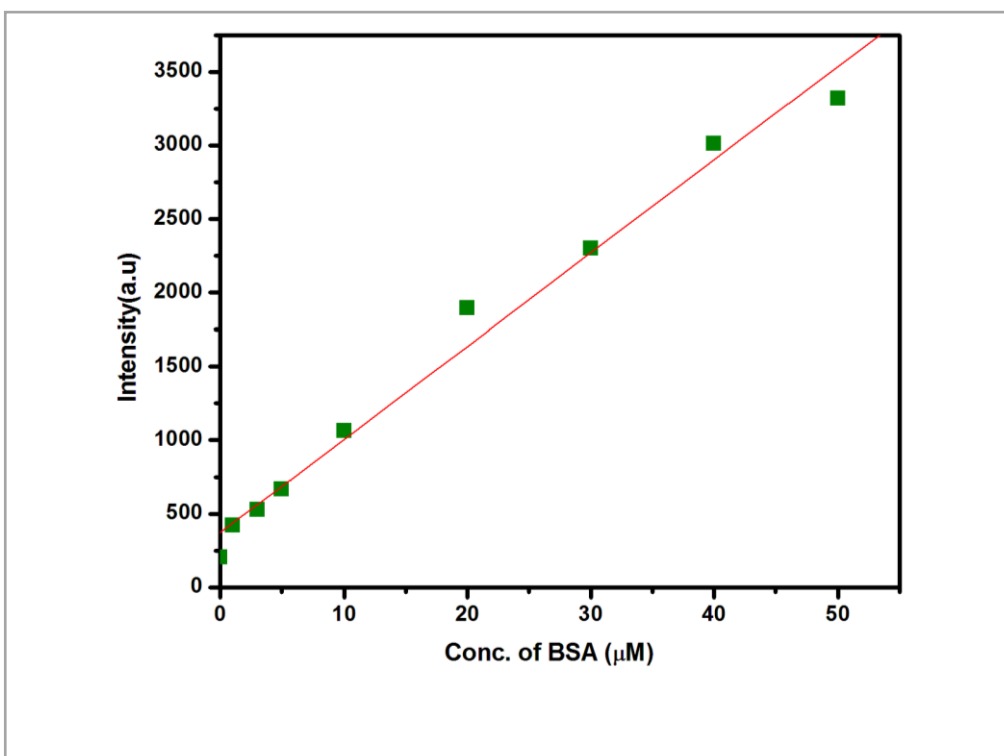

**Fig. S19** The fluorescence spectra of complex1 (0.5 μM) at 350 nm as a function of BSA concentration. ( $\lambda_{\text{ex}}=290$  nm)

**Table S1:** Bond Lengths in Å for **1**.

| Atom | Atom            | Length/Å |
|------|-----------------|----------|
| Co   | N1              | 2.080(3) |
| Co   | N1 <sup>1</sup> | 2.080(3) |
| Co   | N1 <sup>2</sup> | 2.080(3) |
| Co   | N1 <sup>3</sup> | 2.080(3) |
| O1   | C9              | 1.377(5) |
| O1   | C30             | 1.428(5) |
| O2   | C12             | 1.368(5) |
| O2   | C13             | 1.425(5) |
| N1   | C1              | 1.344(4) |
| N1   | C5              | 1.343(5) |
| N2   | C5              | 1.397(4) |
| N2   | C6              | 1.269(4) |
| C1   | C2              | 1.380(5) |
| C2   | C3              | 1.379(6) |
| C3   | C4              | 1.366(5) |
| C4   | C5              | 1.390(5) |
| C6   | C7              | 1.458(5) |
| C7   | C8              | 1.400(5) |
| C7   | C12             | 1.395(5) |
| C8   | C9              | 1.370(5) |
| C9   | C10             | 1.394(6) |
| C10  | C11             | 1.375(6) |
| C11  | C12             | 1.391(5) |
| C11  | O3              | 1.417(3) |
| C11  | O3 <sup>4</sup> | 1.417(3) |
| C11  | O4 <sup>4</sup> | 1.425(3) |
| C11  | O4              | 1.425(3) |

-----•  
<sup>1</sup>-1+Y,1-X,1-Z; <sup>2</sup>1-Y,1+X,1-Z; <sup>3</sup>-X,2-Y,+Z; <sup>4</sup>-X,1-Y,+Z

**Table S2:** Bond Angles in ° for **1**

| Atom            | Atom | Atom            | Angle/°    |
|-----------------|------|-----------------|------------|
| N1              | Co   | N1 <sup>1</sup> | 102.07(6)  |
| N1 <sup>1</sup> | Co   | N1 <sup>2</sup> | 125.58(15) |
| N1              | Co   | N1 <sup>2</sup> | 102.07(6)  |
| N1              | Co   | N1 <sup>3</sup> | 125.58(15) |
| N1 <sup>3</sup> | Co   | N1 <sup>2</sup> | 102.07(6)  |
| N1 <sup>1</sup> | Co   | N1 <sup>3</sup> | 102.07(6)  |
| C9              | O1   | C30             | 116.5(3)   |
| C12             | O2   | C13             | 118.3(4)   |
| C1              | N1   | Co              | 129.0(2)   |
| C5              | N1   | Co              | 112.4(2)   |
| C5              | N1   | C1              | 118.6(3)   |
| C6              | N2   | C5              | 119.8(3)   |
| N1              | C1   | C2              | 122.1(3)   |
| C3              | C2   | C1              | 118.5(4)   |
| C4              | C3   | C2              | 120.2(4)   |
| C3              | C4   | C5              | 118.3(4)   |
| N1              | C5   | N2              | 112.1(3)   |
| N1              | C5   | C4              | 122.1(3)   |
| C4              | C5   | N2              | 125.7(3)   |
| N2              | C6   | C7              | 121.0(3)   |
| C8              | C7   | C6              | 119.2(3)   |
| C12             | C7   | C6              | 120.7(4)   |
| C12             | C7   | C8              | 120.0(4)   |
| C9              | C8   | C7              | 120.2(4)   |
| O1              | C9   | C10             | 116.1(3)   |
| C8              | C9   | O1              | 124.4(4)   |
| C8              | C9   | C10             | 119.4(4)   |
| C11             | C10  | C9              | 121.3(4)   |
| C10             | C11  | C12             | 119.6(4)   |
| O2              | C12  | C7              | 115.6(4)   |
| O2              | C12  | C11             | 124.8(4)   |
| C11             | C12  | C7              | 119.5(4)   |
| O3              | C11  | O3 <sup>4</sup> | 110.9(3)   |
| O3              | C11  | O4              | 111.0(2)   |
| O3 <sup>4</sup> | C11  | O4 <sup>4</sup> | 111.0(2)   |
| O3 <sup>4</sup> | C11  | O4              | 108.5(2)   |
| O3              | C11  | O4 <sup>4</sup> | 108.5(2)   |
| O4 <sup>4</sup> | C11  | O4              | 107.1(3)   |

-----•  
<sup>1</sup>1-Y,1+X,1-Z; <sup>2</sup>-1+Y,1-X,1-Z; <sup>3</sup>-X,2-Y,+Z; <sup>4</sup>-X,1-Y,+Z
